# Supplementary material
Source: Research Square preprint supplement (doi:10.21203/rs.3.rs-8485718/v1)
Supplement: Supplementary file 1 [file b2ae0c8a61a12a1cfb44083a.docx]

Preoperative Fasting and Drinking Compliance Questionnaire

Based on ERAS Guidelines

Section 1. Demographic Information

Age (years): ______

Sex:

☐ Male

☐ Female

Educational level:

☐ Primary school or below

☐ Junior high school

☐ High school / Secondary vocational

☐ College / Bachelor

☐ Master or above

Department of admission:

☐ General surgery

☐ Orthopedic

☐ Gynecology

☐ Urology

☐ Thoracic surgery

☐ Others: ______

Do you have diabetes?

☐ Yes

☐ No

History of previous surgery:

☐ Yes

☐ No

ASA physical status:

☐ I

☐ II

☐ III

☐ IV

Section 2. Surgical Information

Order of surgery (on the operating list):

☐ First

☐ Second

☐ Third or later

Section 3. Preoperative Education

Did you receive preoperative fasting/drinking instructions?

☐ Yes

☐ No

Source(s) of instruction (multiple choices allowed):

☐ Surgeon

☐ Anesthesiologist

☐ Nurse

☐ Printed materials

☐ Video / audio materials

☐ Mobile application / online platform

☐ Other: ______

Do you understand the purpose of preoperative fasting?

☐ Completely understand

☐ Partially understand

☐ Do not understand

Section 4. Actual Preoperative Fasting and Drinking Behavior

Time of last solid food intake before surgery:

Date: ______ Time: ______

Time of last liquid intake before surgery:

Date: ______ Time: ______

Type of last liquid consumed:

☐ Water

☐ Clear juice

☐ Tea

☐ Coffee (without milk)

☐ Carbohydrate drink

☐ Other: ______

Volume of last drink:

☐ <100 mL

☐ 100–200 mL

☐ >200 mL

Section 5. Symptoms and Discomfort Before Surgery

Did you experience any of the following symptoms before surgery? (Multiple choices allowed)

☐ Thirst

☐ Hunger

☐ Dizziness

☐ Weakness

☐ Anxiety

☐ Nausea

☐ Headache

☐ None

Section 6. Perceived Barriers to Compliance

Which factors made it difficult to follow fasting/drinking instructions? (Multiple choices allowed)

☐ Unclear instructions

☐ Conflicting information from different providers

☐ Did not understand the rationale

☐ Hunger

☐ Thirst

☐ Anxiety

☐ Fear of hypoglycemia

☐ Changes in surgery schedule

☐ Habitual belief that “fasting longer is safer”

☐ Other: ______

Section 7. Self-assessed Compliance

Did you strictly follow the given fasting/drinking instructions?

☐ Yes

☐ No

If no, what was the reason?

☐ Forgot

☐ Misunderstood instructions

☐ Felt uncomfortable (thirst/hunger)

☐ Thought it was safer to fast longer

☐ Other: ______

Section 8. Researcher Assessment (completed by trained nurse)

Calculated solid fasting duration: ______ hours

Calculated clear liquid fasting duration: ______ hours

Compliance classification (based on ERAS standards):

☐ Full compliance

☐ Insufficient compliance

☐ Overfasting

☐ Dual non-compliance

Thank you for your cooperation and participation in this study.
